# Supplementary material for: Identifying Core Items of the Japanese Version of the Mother-to-Infant Bonding Scale for Diagnosing Postpartum Bonding Disorder
Source: MDPI journal article supplement (doi:10.3390/healthcare11121740), 2023-06-13
Supplement: s1 [file s1]

File format: MS Word document (.doc format)

Supplementary Table S1. Factor Loadings of Five MIBS-J Items for Each Factor within Different Models

|   | MIBS-J item                                                       | Time | Parent            | Model 1     | Model 2     |             |
|---|-------------------------------------------------------------------|------|-------------------|-------------|-------------|-------------|
|   |                                                                   |      |                   | (1-factor)  | (2-factor)  |             |
|   |                                                                   |      |                   | I           | I           | II          |
| 1 | I feel loving toward my child                                     | W1   | Fathers (n = 166) | <b>0.68</b> | <b>0.70</b> | −0.06       |
|   |                                                                   |      | Mothers (n = 282) | <b>0.68</b> | <b>0.73</b> | −0.10       |
|   |                                                                   | W2   | Fathers           | <b>0.80</b> | <b>0.89</b> | −0.19       |
|   |                                                                   |      | Mothers           | <b>0.83</b> | <b>0.88</b> | −0.04       |
|   |                                                                   | W3   | Fathers           | <b>0.70</b> | <b>0.72</b> | −0.08       |
|   |                                                                   |      | Mothers           | <b>0.75</b> | <b>0.68</b> | 0.08        |
| 2 | I feel scared or panicky when I have to do something for my child | W1   | Fathers           | 0.15        | −0.03       | <b>1.00</b> |
|   |                                                                   |      | Mothers           | 0.24        | −0.02       | <b>1.00</b> |
|   |                                                                   | W2   | Fathers           | 0.11        | −0.09       | <b>0.58</b> |
|   |                                                                   |      | Mothers           | 0.24        | −0.15       | <b>0.55</b> |
|   |                                                                   | W3   | Fathers           | 0.21        | 0.00        | <b>1.00</b> |
|   |                                                                   |      | Mothers           | 0.20        | −0.06       | <b>0.36</b> |
| 6 | I enjoy doing things with my child                                | W1   | Fathers           | <b>0.74</b> | <b>0.74</b> | 0.00        |
|   |                                                                   |      | Mothers           | <b>0.60</b> | <b>0.53</b> | 0.22        |
|   |                                                                   | W2   | Fathers           | <b>0.60</b> | <b>0.55</b> | 0.11        |
|   |                                                                   |      | Mothers           | <b>0.56</b> | 0.14        | <b>0.63</b> |
|   |                                                                   | W3   | Fathers           | <b>0.62</b> | <b>0.60</b> | 0.06        |
|   |                                                                   |      | Mothers           | <b>0.55</b> | 0.04        | <b>0.80</b> |

|    |                                   |    |         |             |             |             |
|----|-----------------------------------|----|---------|-------------|-------------|-------------|
| 8  | I feel protective toward my child | W1 | Fathers | <b>0.58</b> | <b>0.60</b> | −0.10       |
|    |                                   |    | Mothers | <b>0.64</b> | <b>0.66</b> | −0.05       |
|    |                                   | W2 | Fathers | <b>0.74</b> | <b>0.75</b> | −0.09       |
|    |                                   |    | Mothers | <b>0.66</b> | <b>0.76</b> | −0.14       |
|    |                                   | W3 | Fathers | <b>0.78</b> | <b>0.80</b> | −0.06       |
|    |                                   |    | Mothers | <b>0.65</b> | <b>0.79</b> | −0.14       |
| 10 | I feel close to my child          | W1 | Fathers | <b>0.69</b> | <b>0.66</b> | 0.17        |
|    |                                   |    | Mothers | <b>0.68</b> | <b>0.67</b> | 0.02        |
|    |                                   | W2 | Fathers | <b>0.66</b> | <b>0.57</b> | <b>0.36</b> |
|    |                                   |    | Mothers | <b>0.69</b> | <b>0.50</b> | 0.26        |
|    |                                   | W3 | Fathers | <b>0.76</b> | <b>0.74</b> | 0.09        |
|    |                                   |    | Mothers | <b>0.64</b> | <b>0.59</b> | 0.07        |

MIBS-J = mother-to-infant bonding scale; W1 = 5 days after childbirth; W2 = 1 month after childbirth; W3 = 4 months after childbirth; n = 166 for fathers and 282 for mothers; Factor loadings >0.30 are indicated in boldface; the upper figure in each cell represents factor loading (or total variance explained) among fathers, whereas the lower figure in each cell represents factor loading (or total variance explained) among mothers. Item scores after log transformation were entered into an exploratory factor analysis. Each score ranges from 1 (not at all) to 4 (very much). No items were reversed.

File format: MS Word document (.doc format)

Supplementary Table S2. Measurement and Structural Invariance of Four MIBS-J Items between Fathers and Mothers

| Models                    |                                     | $\chi^2$ | $df$ | $\chi^2/df$ | $\Delta\chi^2(df)$ | CFI   | $\Delta$ CFI | RMSEA | $\Delta$ RMSEA | Judgement |
|---------------------------|-------------------------------------|----------|------|-------------|--------------------|-------|--------------|-------|----------------|-----------|
| W1 fathers vs.<br>mothers | Configural                          | 16.179   | 4    | 4.045       | Ref                | 0.983 | Ref          | 0.058 | Ref            | Accept    |
|                           | Metric                              | 21.976   | 7    | 3.139       | 5.797(3) NS        | 0.979 | 0.004        | 0.049 | $\Delta$ 0.009 | Accept    |
|                           | Scalar                              | 48.216   | 11   | 4.383       | 26.24(4) ***       | 0.948 | 0.031        | 0.062 | 0.013          | Reject    |
| W2 fathers vs.<br>mothers | Configural                          | 17.203   | 4    | 4.301       | Ref                | 0.986 | Ref          | 0.061 | Ref            | Accept    |
|                           | Metric                              | 18.906   | 7    | 2.701       | 1.703(3) NS        | 0.988 | +0.002       | 0.044 | $\Delta$ 0.017 | Accept    |
|                           | Scalar                              | 56.213   | 11   | 5.110       | 37.307(4) ***      | 0.953 | 0.035        | 0.068 | 0.024          | Reject    |
| W3 fathers vs.<br>mothers | Configural                          | 8.820    | 4    | 2.205       | Ref                | 0.994 | Ref          | 0.037 | Ref            | Accept    |
|                           | Metric                              | 28.868   | 7    | 4.124       | 20.048(3) ***      | 0.974 | 0.020        | 0.059 | 0.22           | Reject    |
|                           | Metric (partial invariance) item 1  | 23.324   | 6    | 3.887       | 14.504(2) ***      | 0.980 | 0.014        | 0.057 | 0.020          | Reject    |
|                           | Metric (partial invariance) item 6  | 28.107   | 6    | 4.685       | 19.287(2) ***      | 0.974 | 0.020        | 0.064 | 0.027          | Reject    |
|                           | Metric (partial invariance) item 10 | 10.114   | 6    | 1.686       | 1.294(2) NS        | 0.995 | +0.001       | 0.028 | $\Delta$ 0.009 | Accept    |
|                           | Scalar                              | 73.648   | 15   | 6.695       | 63.534(9) ***      | 0.926 | 0.069        | 0.103 | 0.075          | Reject    |

MIBS-J = Japanese modification of the mother-to-infant bonding scale;  $df$  = degree of freedom; \* $p$  <.05, \*\* $p$  <.01, \*\*\* $p$  <.001; Ref = reference;

CFI = comparative fit index; RMSEA = root mean square error of approximation; NS = not significant; W1 = 5 days after childbirth; W2 = 1

month after childbirth; W3 = 4 months after childbirth;  $n$  = 350 for fathers and 543 for mothers
